# Supplementary material
Source: PubMed Central journal article supplement (PMC3160034)
Supplement: supp_tpc.111.086017_Supplemental_Data.pdf [file supp_tpc.111.086017_Supplemental_Data.pdf]

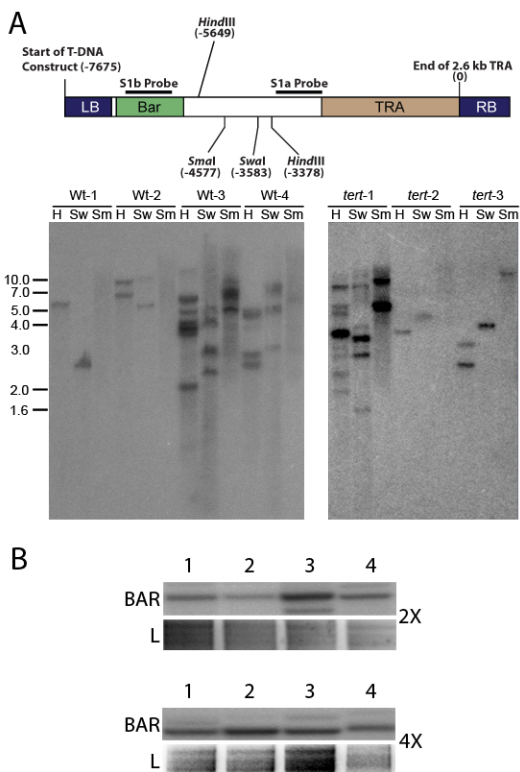

### Supplemental Figure 1. DNTF detected by DNA Gel Blot analysis.

A. Detailed schematic diagram of PWY86 (top). Restriction sites for HindIII (H), SwaI (Sw), and SmaI (Sm) are shown along with nucleotide positions. DNA gel blot analysis of *A. thaliana* transformants (bottom). Results for 4X *tert* and 4X wild type plants transformed with the 2.6kb TRA using the probe indicated in the top diagram are shown. PETRA revealed DNTF in Wt-3, Wt-4, *tert*-1, *tert*-2, and *tert*-3 transformants, but not in Wt-1 or Wt-2. Hybridization products from DNA digested with HindIII are expected to be ~500bp smaller than SwaI products and 1.5kb smaller than SmaI products. Molecular weight markers are in kilobase pairs. B. DNA gel blot analysis of 2X and 4X wild type lines carrying the 2.6kb transgenic TRA. The blot was hybridized using a probe for the Basta resistance gene (BAR). L (loading) shows EtBr stained gels prior to transfer.

A

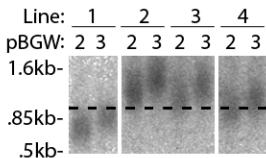

B

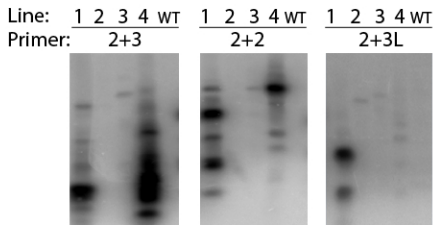

**Supplemental Figure 2. TRAs shorter than 1 kb are prone to end-joining reactions.**

A. PETRA results are shown for four lines transformed with a 100bp TRA using PBGW-2 and -3 primers, which target a unique sequence in the T-DNA 250 or 420 bp, respectively, upstream of the TRA. At least one telomere in lines #1 and #4 is shorter than 1kb (dashed line). B. TF-PCR results from the lines analyzed in (A). WT indicates a control TF-PCR reaction performed with an untransformed 4X WT control. Primers PBGW-2 and PBGW-3 were used for the reactions on the left, and only primer PBGW-2 was used on the right. A combination of 3L and PBGW-2 primers were used to test for non-sister chromatid fusions.

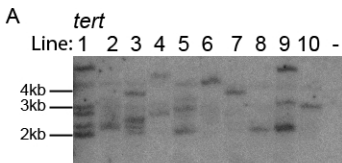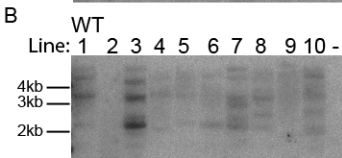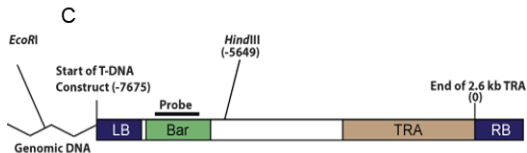

**Supplemental Figure 3. 4X *tert* acquires the same number of T-DNA insertions as 4X wild type.**

DNA gel blot analysis of *tert* (A) and wild type (B) samples digested with *HindIII* and *EcoRI* and hybridized with a probe for the *BAR* gene (Sb. *EcoRI* cuts within the adjacent genomic DNA (see map in C), whereas *HindIII* cuts downstream of the *BAR* gene. The negative (-) control is 4x WT without a transgene. Numbers indicate nucleotide positions within the PWY86 plasmid.

**Supplemental Table 1: DNTF efficiencies in different genetic backgrounds.**

| Background     | Vector | TRA Length          | % DNTF        |
|----------------|--------|---------------------|---------------|
| WT 2X          | pWY86  | 2600                | 10% (12/126)  |
| WT 4X          | pBGW   | 100                 | 16% (13/80)   |
| WT 4X          | pBGW   | 200                 | 25% (24/96)   |
| WT 4X          | pWY86  | 400                 | 35% (28/80)   |
| WT 4X          | pWY86  | 700                 | 37.5% (36/96) |
| WT 4X          | pWY86  | 800                 | 47% (47/100)  |
| WT 4X          | pWY86  | 900                 | 53.5 (68/127) |
| WT 4X          | pBGW   | 950                 | 55% (53/96)   |
| WT 4X          | pWY86  | 2600                | 58% (35/60)   |
|                |        |                     | 54% (26/48)   |
| <i>ku70</i>    | pWY86  | 2600                | 2% (2/88)     |
| <i>lig4</i>    | pWY86  | 2600                | 35% (26/73)   |
| G4 <i>tert</i> | pWY86  | 2600                | 71% (68/96)   |
|                |        |                     | 74% (53/72)   |
| WT 4X          | pBGW   | 750 (TTAGGG)<br>500 | 19% (15/80)   |
| WT 4X          | pBGW   | (TGGTTGAT)          | 1.3% (1/80)   |
| WT 4X          | pBGW   | 600 (UAS)           | 0% (0/100)    |
| WT 4X          | pBGW   | 850 (GGGATTT)       | 0% (0/80)     |

**Supplemental Table 2: Primers used in this study.**

**Primers for Gateway cloning of repeat arrays:**

---

|                                     |                                                     |
|-------------------------------------|-----------------------------------------------------|
| Arabidopsis telomere oligo #1       | CCCTAAACCCTAAACCCTAAACCCTAAACCCTAAA                 |
| Arabidopsis telomere oligo #2       | TTTAGGGTTTAGGGTTTAGGGTTTAGGGTTTAGGG                 |
| Jumbled Arabidopsis repeat oligo #1 | CCATCAACCATCAACCATCAACCATCAACCATCAA                 |
| Jumbled Arabidopsis repeat oligo #2 | TGGTTGATGGTTGATGGTTGATGGTTGATGG TTGA                |
| UAS oligo #1                        | CGGAAGACTCTCCTCCGCGGAAGACTCTCCTCCGCGGAAGACTCTCCTCCG |
| UAS oligo #2                        | AGTCTTCCGCGGAGGAGAGTCTTCCGCGGAGGAGAGTCTTCCGCGGAGGAG |
| Human telomere oligo #1             | CCCTAACCCTAACCCTAACCCTAACCCTAA                      |
| Human telomere oligo #2             | GGTTAGGGTTAGGGTTAGGGTTAGGGTTAG                      |

---

**Primers for TAIL-PCR:**

---

|          |                                       |
|----------|---------------------------------------|
| TAIL-1   | AGC TGC ATT AAT GAA TCG GCC AAC GCG C |
| TAIL-2   | AGC TGC ATT AAT GAA TCG GCC AAC GCG   |
| TAIL-3   | AGA GGC GGT TTG CGT ATT GGC TAG AGC   |
| hiTAIL-1 | CGT CTA TTG GAC CGA CAG TTG C         |
| hiTAIL-2 | TGC ATT TTC CAG GGC ATT TTT           |
| hiTAIL-3 | TCC GCT CAC AAT TCC ACA CAA           |
| AD1      | NGT CGA SWG ANA WGA A                 |
| AD2      | TGW GNA GSA NCA SAG A                 |
| AD3      | AGW GNA GWA NCA WAG G                 |
| AD6      | WGT GNA GWA NCA NAG A                 |

---

**Primers for PETRA:**

---

|         |                                     |
|---------|-------------------------------------|
| PETRA-T | CTCTAGACTGTGAGACTTGGACTACCCTAAACCCT |
| PETRA-A | CTCTAGACTGTGAGACTTGGACTAC           |
| PWY86#1 | TACGTCTAGATCTGGCGCGC                |
| PWY86#3 | CATAAAGGATCCCCGATCGTT               |
| PBGW#3  | TATGGAACGTCAGTGGAGCATTT             |
| PBGW#4  | AGTTGACCGTGCTTGTCTCGAT              |

---
